# Neural Mediators of Altered Perceptual Choice and Confidence Using Social Information

Tiasha Saha Roy<sup>a</sup>, Bapun Giri<sup>b,c</sup>, Arpita Saha Chowdhury<sup>a</sup>, Satyaki Mazumder<sup>a</sup>, and Koel Das<sup>\*a</sup>

<sup>a</sup>Department of Mathematics and Statistics, Indian Institute of Science Education and Research Kolkata, Mohanpur, Nadia-741246, India

<sup>b</sup>Department of Psychology, University of Wisconsin-Milwaukee, PO Box 413, Milwaukee, WI 53201, USA

<sup>c</sup>Department of Anesthesiology, University of Michigan, Ann Arbor, Michigan 48109, USA

January 12, 2019

---

\*Corresponding Author: koel.das@iiserkol.ac.in

## 1 Abstract

2 Understanding how individuals utilize social information while making perceptual decisions  
3 and how it affects their decision confidence is crucial in a society. Till date, very little  
4 is known about perceptual decision making in humans under the influence of social cues  
5 and the associated neural mediators. The present study provides empirical evidence of how  
6 individuals get manipulated by social cues while performing a face/car identification task.  
7 Subjects were significantly influenced by what they perceived as decisions of other subjects  
8 while the cues in reality were completely non-informative. Subjects in general tend to in-  
9 crease their decision confidence when their individual decision and social cues coincide, while  
10 their confidence decreases when cues conflict with their individual judgments often leading  
11 to reversal of decision. Using a novel statistical model, it was possible to rank subjects based  
12 on their propensity to be influenced by social cues. This was subsequently corroborated by  
13 analysis of their neural data. Neural time series analysis revealed no significant difference in  
14 decision making using social cues in the early stages unlike neural expectation studies with  
15 predictive cues. Multivariate pattern analysis of neural data alludes to a potential role of  
16 frontal cortex in the later stages of visual processing which appeared to code the effect of  
17 social cues on perceptual decision making. Specifically medial frontal cortex seems to play  
18 a role in facilitating perceptual decision preceded by conflicting cues.

## 19 Keywords

20 Perceptual decision making; Social influence; Computational modeling; Gamma mixture  
21 model; Multivariate pattern classification;

## 22 Introduction

23 In todays information-satiated society, perceptual decision and subsequent action is greatly  
24 influenced by social information. Modern human society is increasingly organized around  
25 collective opinions reflected in peoples increased use of web ratings for daily choices about  
26 consumer products, lodging, food and entertainment [1]. Opinions and choice can easily  
27 propagate through social networks [2, 3] in this digitized world and even political opinions  
28 can be manipulated using social transmission [4]. Human tendency to conform to social  
29 influence has been explored systematically in classic studies by Solomon Asch [5, 6] and  
30 others ([7–15] and see [16–18] for reviews). Reliance on others opinion is not unique to  
31 humans and different species of animal depend on collective opinion to decide life-critical  
32 perceptual tasks like foraging for food, placement of their nests and navigation [19–21] and  
33 evolve optimal decision strategies accordingly. Beneficial effect of group decision can be  
34 traced as early as 1907 when Francis Galton analyzed the opinions of 787 people about the  
35 weight of an ox and found that combining their numerical assessments resulted in a median  
36 estimate that was remarkably close to the true weight of the ox [22]. In recent times, this  
37 idea has been popularly referred to as the wisdom of the crowds [23]. However, effect of  
38 social cues in the form of collective decision on individual percept and the underlying neural

39 mechanism remains largely unexplored [12, 18].

40 Neural expectation studies over the last decade have demonstrated that predictive cues  
41 typically lead to changes in early sensory processing [24–34] but recent research have con-  
42 tradicted this claim [35, 36]. We sought to examine whether social information produces  
43 similar early top down changes in sensory cortex. We propose to manipulate the individual  
44 choice and decision confidence of humans performing a perceptual task by presenting visual  
45 cues which the subjects presumed to be collective opinion of other well performing partici-  
46 pants. The social cues can be concurring, conflicting or neutral to the individual perceptual  
47 decision of the subjects. Using a novel statistical model, we studied the effect of the three  
48 types of social cues on their individual choice. We also analyzed the neural signals to explore  
49 the neural mediators producing the change in their individual choice upon presenting social  
50 cues. Finally we performed a source reconstruction of the neural signals to elucidate the  
51 role played by specific spatio-temporal areas under the influence of social cues. Specifically  
52 we explored the following questions:

53 Can we manipulate individual perceptual decision upon presenting non-informative social  
54 information cues when the social decision differs from the individual choice? Does this  
55 reversal of opinion depend upon how confident the subject was in his/her choice without  
56 the social information?

57 Can the individual decision confidence be augmented when the social cues concur with  
58 the individual choice?

59 Can we identify the flip-floppers based on computational modeling of their behavioural  
60 data and corroborate using neural data?

61 Can we explore the neural mediators that contribute to the change in individual percept  
62 post social information?

63 Using a face/car discrimination task, we show that it is possible to manipulate individual  
64 choice post presentation of social cues in the guise of others decision. Although the social  
65 cues were randomly generated and completely non-informative, it was possible to alter the  
66 individual percept as subjects presumed the social cues as concurring, conflicting or neutral.  
67 Irrespective of the order in which they viewed the images with/without social cues, most  
68 subjects were affected by the social cues in a systematic manner. The distribution of the  
69 decision confidence under such set up was found to be bi-modal and skewed with one mode  
70 guided by social cues and the other influenced by their own decision. The tendency to  
71 adhere to their own decision depends on the confidence level of the subject and is reflected  
72 in the skewness of the data distribution. Hence using a Gaussian model to explore the data,  
73 which is the usual practice [37], might not capture the complexities of data completely. We  
74 propose a novel model using a mixture of shifted gamma and negative gamma distribution  
75 which successfully captures the effect of social cues on individual choice. To the best of our  
76 knowledge, this is the first work using a mixture of variants of gamma distributions which  
77 captures the bi-modal nature as well as the skewness (whether high or low) of this kind  
78 of data. We compare our proposed model with bi-modal Gaussian and demonstrate the  
79 superiority of our model convincingly. Based on the behavioural model, it was possible to  
80 objectively identify subjects most prone to change their decisions upon presenting others'  
81 opinion. Subsequent multivariate pattern analysis (MVPA) of neural data substantiated the  
82 above finding. Neural analysis also elucidated existence of a late component that seem to

83 code the effect of this social information on individual perceptual decision. Source analysis  
84 of neural data revealed a role of frontal cortex in coding perceptual decision using social  
85 information. Our analysis alludes to the role of medial frontal cortex in coding information  
86 when conflicting social decisions are provided as cues.

## 87 **Materials and Methods**

### 88 **Ethics Statement**

89 This study was carried out in accordance with the recommendations of ‘Institute Ethics  
90 Committee’ at Indian Institute of Science Education and Research Kolkata, India with  
91 written informed consent from all subjects. All subjects gave written informed consent in  
92 accordance with the Declaration of Helsinki. The protocol was approved by the ‘Institute  
93 Ethics Committee’.

### 94 **Stimuli and display**

95 The data set consisted of  $290 \times 290$  pixel 8-bit gray-scale images of 12 cars and 12 faces with  
96 equal number of frontal views and side views. Face images were taken from the Max Planck  
97 Institute for Biological Cybernetics face database [38]. All stimuli were filtered to attain a  
98 common frequency power spectrum. Noise was generated by filtering white Gaussian noise  
99 (std of  $3.53 \text{ cd/m}^2$ ) by the average power spectrum. Noise was added to the base stimuli  
100 to generate a set of 250 images (125 face, 125 car). Contrast energy of all 250 images was  
101 matched at  $0.3367 \text{ deg}^2$ . The observers were at a distance of 125 cm from the display with  
102 a mean luminance of  $25 \text{ cd/m}^2$ . Images subtended a visual angle of 4.57 degree.

### 103 **Observers and Experiment**

104 Twenty naïve observers (ages: 22-28 mean: 25.85 std: 2.39) participated in the study which  
105 consisted of 1000 trials split into 40 successive sessions. Three subjects were not considered  
106 in the analysis due to high degree of noise present in the neural data. All observers had  
107 normal or corrected-to-normal vision and disclosed no history of neurological problems. The  
108 observers performed a face/car discrimination task and reported their decision using a 10-  
109 point confidence rating. Observers perceptually categorized briefly (50 ms) presented images  
110 of cars (C) and faces (F) embedded in filtered noise. The observers began by fixating on a  
111 central cross and clicking anywhere on the screen. After a delay of 50 ms, a cue was presented  
112 for 100 ms followed by a variable delay of 500-800 ms. The stimulus was presented for 50 ms  
113 followed by delay of 700 ms after which the response screen appeared. The observers reported  
114 their decision using the confidence rating with a rating of 1 indicating complete confidence  
115 that the stimuli was a face and a rating of 10 indicating that it was a car with complete  
116 confidence. The observers reported their confidence rating on a grey-scaled colorwheel in  
117 the response screen to avoid any motor bias (Fig. 1A). There were four types of cues, FF,  
118 CC, FC, CF, representing decisions of two independent well performing observers who had  
119 previously completed the study. Cues were systematically manipulated such that equal

120 number of images (250 per condition) have FF cues, FC/CF cues and CC cues. There were  
121 also additional 250 images without cues. Thus each observer saw one stimuli four times  
122 preceded by FF cue, FC/CF cue, CC cue and no cue in the course of the experiment in  
123 random order and the responses were recorded. Observers were naïve to the purpose of the  
124 study and in subsequent questionnaire after the study failed to realize that the cues were  
125 not decision cues and were in fact synthetic cues generated randomly.

126 EEG activity was recorded using a 64 channel active shielded electrodes mounted in  
127 an EEG cap following the international 10/20 system. EEG signals were recorded using  
128 2 linked Nexus-32 bioamplifiers at a sampling rate of 512 Hz., band-pass filtered (0.01 –  
129 40 Hz.) and then referenced using average referencing. Trials with ocular artifacts (blinks  
130 and eye movements) were detected using bipolar electro-oculograms (EOG) with amplitude  
131 exceeding  $\pm 100$  mV or visual inspection and not included in the analysis.

## 132 Behavioural model

133 We propose a statistical model to explore the effect of social cues on perceptual decision  
134 making. In the experiment, for every face/car stimuli, subject responses corresponding to  
135 the three types of social cues (FF, FC/CF and CC) along with a response to the same stimuli  
136 with no-cues were recorded. The response to the no-cue image was taken as the individual  
137 decision of the subject,  $k_1 \in \{1, 2, \dots, 10\}$ , for that image. Further, we define a social cue  
138 variable  $k_2$  as

$$k_2 = \begin{cases} 1 & \text{if cue shown was 'FF'}, \\ 5 & \text{if cue shown was 'FC/CF'}, \\ 10 & \text{if cue shown was 'CC'}. \end{cases}$$

139 All the images in which the individual decision of the subject was  $k_1$ , were considered  
140 and the distribution of the decisions on the same images under the influence of each type  
141 of social cue was studied. Hence the data comprised of the decisions of a particular subject  
142 for every  $(k_1, k_2)$  pair. In most cases, the data distributions were bimodal in nature having  
143 positive and/or negative skew, as seen in Fig. 1B. Hence a two-component mixture model  
144 based on variants of the gamma distribution was proposed to explain the decisions taken  
145 by the subject under the influence of a social cue. The data was made continuous by using  
146 jittering (addition of uniform random noise, [39]) to provide flexibility in modeling.

147 Let  $\mathbf{X}_i(k_1, k_2)$  contain the decisions taken by the  $i^{\text{th}}$  subject on all images, where his/her  
148 individual decision was  $k_1$  and cue shown was  $k_2$ . We consider the elements of  $\mathbf{X}_i(k_1, k_2)$   
149 as i.i.d. observations from a distribution. To propose the statistical model depending on  
150 the choices of  $(k_1, k_2)$  we first introduce some terminology and notation. The probability  
151 densities of *shifted gamma* and *negative gamma* distributions are given respectively as

$$g(x) = \frac{\beta^\alpha}{\Gamma(\alpha)} (x-1)^{\alpha-1} e^{-\beta(x-1)}, x \geq 1, \alpha \geq 1, \beta > 0 \quad (1)$$

152

$$ng(x) = \frac{\beta^\alpha}{\Gamma(\alpha)} (L-x)^{\alpha-1} e^{-\beta(L-x)}, x \leq L, \alpha \geq 1, \beta > 0, \quad (2)$$

153 where  $\alpha$  and  $\beta$  are the shape and scale parameters, respectively and  $L$  is a known constant.

154 Based on the equations (1) and (2) the following models are proposed depending on the  
155 choices of  $(k_1, k_2)$ . If  $k_1 \in \{1, 2, \dots, 5\}$  and  $k_2 \in \{1, 5\}$  we take our model as

$$f(x) = p g_{\alpha_1, \beta_1}(x) + (1 - p) g_{\alpha_2, \beta_2}(x), \quad (3)$$

156 a mixture of two shifted gamma distributions. When  $k_1 \in \{6, 7, \dots, 10\}$  and  $k_2 = 10$  the  
157 proposed model is

$$f(x) = p n g_{\alpha_1, \beta_1}(x) + (1 - p) n g_{\alpha_2, \beta_2}(x), \quad (4)$$

158 a mixture of two negative gamma distributions. Finally if either  $k_1 \in \{1, 2, \dots, 5\}$  and  
159  $k_2 = 10$  or  $k_1 \in \{6, 7, \dots, 10\}$  and  $k_2 \in \{1, 5\}$  our suggested model is

$$f(x) = p g_{\alpha_1, \beta_1}(x) + (1 - p) n g_{\alpha_2, \beta_2}(x), \quad (5)$$

160 a mixture of a shifted gamma and a negative gamma distribution, where  $0 \leq p \leq 1$  is the  
161 mixing parameter.

## 162 Parameter space of the model

163 We have taken the restricted parameter space for the shape parameter ( $\alpha$ ) in both the  
164 distributions (equations (1) and (2)) so that mode of the distribution is defined and either  
165 that is more than or equal to 1 (for shifted gamma case) or that is less than or equal to  
166  $L$  (for negative gamma case). In our case, we consider  $L$  to be 11. In particular for both  
167 shifted-gamma and negative-gamma distributions,

- 168 • the shape parameter  $\alpha \in [1, \infty)$  and
- 169 • the scale parameter  $\beta \in (0, \infty)$ .

## 170 Estimation of the model parameters

171 Next, for the purpose of estimation of parameters of our proposed model and further infer-  
172 ence, only those data are considered which have more than 10 observations. Note that the  
173 parameter estimates depend on  $i$  as well as  $(k_1, k_2)$ , that is to say, for every individual  $i$ , the  
174 parameter estimates may vary for different choices of  $(k_1, k_2)$ . Similarly for a given  $(k_1, k_2)$ ,  
175 parameter estimates of the proposed model may vary from individual to individual. We  
176 estimate the model parameters by maximum likelihood estimation procedure [40]. Since the  
177 proposed models are mixture densities, so to calculate the maximum likelihood estimates  
178 (MLE) we invoke the technique of EM algorithm [40]. However, since closed form solu-  
179 tion for estimates of shape parameters do not exist, we apply Newton Raphson numerical  
180 technique [41] within each M-step of the EM-algorithm.

## 181 Calculation of MLE of the parameters of the proposed mixture models

182 The calculation of MLE of the parameters based on EM algorithm for the mixture of a

183 shifted gamma and a negative gamma model (equation [5]) is demonstrated here. Suppose  
 184  $X_1, \dots, X_n$  be i.i.d. observations from

$$f(x) = p g_{\alpha_1, \beta_1}(x) + (1 - p) n g_{\alpha_2, \beta_2}(x).$$

185 We define an auxiliary variable  $Y_i$  such that

$$Y_i = \begin{cases} 1 & \text{if } X_i \sim g_{\alpha_1, \beta_1}(x), \\ 0 & \text{if } X_i \sim n g_{\alpha_2, \beta_2}(x). \end{cases}$$

186 So the complete likelihood and complete log-likelihood are given by

$$L = \prod_{i=1}^n [p g_{\alpha_1, \beta_1}(x_i)]^{y_i} [(1 - p) n g_{\alpha_2, \beta_2}(x_i)]^{(1 - y_i)} \text{ and}$$

187

$$l = \sum_{i=1}^n [y_i \ln(p g_{\alpha_1, \beta_1}(x_i)) + (1 - y_i) \ln((1 - p) n g_{\alpha_2, \beta_2}(x_i))],$$

188 respectively. The calculations are done using E-step and M-step.

### 189 E-step

190  $y_i$ s' are replaced with their conditional expected values

$$\begin{aligned} \hat{Y}_i &:= E(Y_i | X_i = x_i) \\ &= \frac{p g_{\alpha_1, \beta_1}(x)}{p g_{\alpha_1, \beta_1}(x_i) + (1 - p) n g_{\alpha_2, \beta_2}(x_i)}. \end{aligned}$$

### 191 M-step

192 The MLE of  $p$  is obtained by differentiating  $l$  with respect to  $p$  and replacing the unobserved  
 193  $y_i$  by  $\hat{y}_i$  as

$$\hat{p} = \frac{\sum_{i=1}^n \hat{y}_i}{n}.$$

194 Differentiating  $l$  with respect to  $\alpha_1$  and  $\beta_1$ , respectively, and replacing the unobserved  $y_i$  by  
 195  $\hat{y}_i$ , we obtain

$$\frac{\Gamma'(\alpha_1)}{\Gamma(\alpha_1)} - \ln(\alpha_1) = \ln C_1 + \frac{\sum_{i=1}^n \hat{y}_i \ln(x_i - 1)}{\sum_{i=1}^n \hat{y}_i}, \quad (6)$$

196 and  $\beta_1 = \alpha_1 C_1$ , where  $\Gamma(\cdot)$  is the gamma function and  $\Gamma'(\cdot)$  is it's derivative and

$$C_1 = \frac{\sum_{i=1}^n \hat{y}_i}{\sum_{i=1}^n \hat{y}_i (x_i - 1)}.$$

197 Notice that the closed form solution for the MLE of shape parameter  $\alpha_1$  is not tractable.  
 198 So we use Newton-Raphson technique for getting the numerical solution of the equation (6).

199 Once the MLE of  $\alpha_1$  is obtained as  $\hat{\alpha}_1$  using numerical technique, MLE of  $\beta_1, \hat{\beta}_1$ , is obtained  
200 by replacing  $\alpha_1$  with  $\hat{\alpha}_1$  in the equation  $\beta_1 = \alpha_1 C_1$ . Similarly we differentiate  $l$  with respect  
201 to  $\alpha_2$  and  $\beta_2$ , respectively, and replace the the unobserved  $y_i$ 's by  $\hat{y}_i$ 's to get

$$\ln \alpha_2 - \frac{\Gamma'(\alpha_2)}{\Gamma(\alpha_2)} = \ln \frac{1}{C_2} - \frac{\sum_{i=1}^n (1 - \hat{y}_i) \ln(L - x_i)}{\sum_{i=1}^n (1 - \hat{y}_i)} \quad (7)$$

202 and  $\beta_2 = \alpha_2 C_2$ , where

$$C_2 = \frac{\sum_{i=1}^n (1 - \hat{y}_i)}{\sum_{i=1}^n (1 - \hat{y}_i)(L - x_i)}.$$

203 As above Newton-Raphson technique is employed to get MLE of  $\alpha_2$  as  $\hat{\alpha}_2$  and once it is  
204 obtained, the MLE of  $\beta_2$  is found by replacing  $\alpha_2$  with  $\hat{\alpha}_2$  in the equation  $\beta_2 = \alpha_2 C_2$ . We  
205 start with an initial guess for the parameters  $(\alpha_1, \beta_1, \alpha_2, \beta_2)$  and  $p$  and then follow the E-step  
206 and M-step, iteratively, until convergence.

207 For the other models given by equations (3) and (4), similar steps as described above  
208 have been followed with little modifications. Hence detailed calculations for the other models  
209 are omitted here.

## 210 Goodness of fit

211 To understand how well our model fits the observed data, Kolmogorov-Smirnov (KS) test  
212 statistic [42], based on the maximum absolute differences between the hypothesized cumu-  
213 lative distribution function (cdf) and empirical cumulative distribution function (ecdf) was  
214 used. For each subject  $i$ , there were  $N_i$  models to be tested simultaneously and therefore  
215 arose the case of multiple testing. To control the family wise error rate, arising due to  
216 multiple hypotheses testing per subject, we used the Holm-Bonferroni method [43] with a  
217 family-wise error rate (FWER) of 0.05.

## 218 Model prediction

219 We use 10-fold cross validation procedure to study the predictive performance of the pro-  
220 posed model. Since our data was bimodal in nature, it would not have been meaningful to  
221 judge this performance on the basis of a single predictive interval. To address this issue, we  
222 apply the following concept of highest probability density region (HPDR) [44] which broadly  
223 computes the smallest region that contains most of the probability.

224 **Definition:** Let  $f(x)$  be the probability density function of a random variable  $X$ . Then  
225 the  $100(1 - \alpha)\%$  HPDR is defined as the subset  $R(f_\alpha)$  of real numbers,  $\mathbb{R}$ , such that

$$R(f_\alpha) = \{x : f(x) \geq f_\alpha\},$$

226 where  $f_\alpha$  is the largest constant with  $P(X \in R(f_\alpha)) \geq 1 - \alpha$ .

227 In each fold, model was trained on the training set and the 85% HPDR was computed.  
228 It was checked whether the validation set falls in the estimated HPDR and the process was  
229 repeated for each cross-validation fold.



## 230 Model comparison

231 We compared the performance of our proposed model with the 2-component Gaussian mix-  
232 ture model using likelihood ratio test [40]. Data was divided into 10 test sets using 10-fold  
233 cross validation and for each set the likelihood was estimated from each of the two models.  
234 Finally, the medians of the likelihood ratios across the folds were computed for each of the  
235 models for the purpose of comparison.

## 236 Behavioral data processing

237 Guided by the proposed model the behaviour of the individuals was analyzed based on the  
238 following measures.

## 239 Distance metric computation using the model

240 To quantify the overall shift in decisions from the subjects' individual choice, the following  
241 distance was used

$$D_i(k_1, k_2) = \begin{cases} \sqrt{\mathbf{x}_i' \mathbf{x}_i} & \text{if } k_1 = k_2, \\ \sqrt{\mathbf{x}_i' \Sigma^{-1} \mathbf{x}_i} & \text{otherwise,} \end{cases} \quad (8)$$

242 where  $\mathbf{x}_i = (k_1 - \mathbf{m}_1(i), k_1 - \mathbf{m}_2(i))'$ ,  $\mathbf{m}_1$  and  $\mathbf{m}_2$  being the vectors containing the two  
243 modes of the  $N_{(k_1, k_2)}$  subjects and  $i = 1, 2, \dots, N_{(k_1, k_2)}$ . Here  $N_{(k_1, k_2)}$  denotes the number of  
244 subjects available corresponding to  $(k_1, k_2)$

245 and  $\Sigma$  is the estimated variance covariance matrix of estimates of the modes for a par-  
246 ticular choice of  $(k_1, k_2)$ , given by

$$\Sigma = \begin{bmatrix} \text{Var}(\mathbf{m}_1) & \text{Cov}(\mathbf{m}_1, \mathbf{m}_2) \\ \text{Cov}(\mathbf{m}_1, \mathbf{m}_2) & \text{Var}(\mathbf{m}_2) \end{bmatrix}.$$

## 247 Social Bias

248 Using the cumulative distribution functions of shifted-gamma and negative gamma distri-  
249 butions (as calculated in SI) and equations (3)–(5) the proportion of decisions between  $k_1$   
250 and  $k_2$  in presence of social cues was estimated. The average proportion of decisions ( $p_i$ )  
251 per subject across the  $(k_1, k_2)$  pairs that have been reported in tables S5–S8 is considered.  
252 We rank the subjects based on social bias score, defined as

$$W_i = \frac{p_i - 0.5}{\sigma / \sqrt{n}},$$

253 for  $i \in \{1, 2, \dots, 17\} \setminus \{2, 3\}$  with  $\sigma$  denoting the sample standard deviation of the proportions  
254  $p_i$ . Only those subjects were considered for further analysis whose  $W_i$  exceeds 1.96, indicating  
255 that the corresponding proportions are significantly more than chance.

## 256 **Neural data processing**

257 The preprocessed EEG signals were time-locked to stimulus onset and included a 200 ms  
258 pre-stimulus baseline and 500 ms post-stimulus interval.

## 259 **Multivariate pattern analysis of EEG**

260 Multivariate pattern analysis was used to extract meaningful information from the multi  
261 dimensional EEG data. Since the neural data is high dimensional and suffers from small  
262 sample size problem [45], a recently proposed principal component analysis (PCA) based  
263 non-linear feature extraction technique –‘Classwise Principal Component Analysis’ (CPCA)  
264 [45] has been used to reduce the dimensionality of the EEG signals and extract informative  
265 features. The main goal of CPCA is to identify and discard non-informative subspace in  
266 data by applying principal component based analysis to each class. The classification is  
267 then carried out in the residual space, in which small sample size conditions and the curse  
268 of dimensionality no longer hold. Linear Bayesian Classifier was then used for computing  
269 the choice probability for single trial EEG data for each subject. Pattern analysis was  
270 performed using 10-fold cross validation. The original data was partitioned into 10 equal  
271 size subsamples. Of the 10 subsamples, a single subsample was retained as the test data,  
272 and the remaining 9 subsamples were used in training the classifier. The performance of  
273 the classifier is captured by the receiver operating characteristics (ROC) curve which plots  
274 the true positive rate vs. false positive rate at different classification thresholds. The area  
275 beneath this ROC curve (AUC) is often used as a measure to determine the overall accuracy  
276 of the classifier [46]. We utilize the well-known approach of calculating the area under the  
277 ROC by finding the MannWhitney U-statistic for the two-sample problem [47].

## 278 **Source Reconstruction**

279 To identify underlying neuronal sources responsible for generating differences in the ERPs  
280 corresponding to the face and car trials under the influence of cues, source reconstruction was  
281 performed using sLORETA software (<http://www.uzh.ch/keyinst/loreta>). sLORETA  
282 (standardized low resolution brain electromagnetic tomography) is based on standardization  
283 of the minimum norm inverse solution which considers the variation of actual sources and  
284 the variation due to noisy measurement (if any) as well [48]. As a result, it does not have  
285 any localization bias even in the presence of measurement and biological noise. The head  
286 model for the inverse solution uses the electric potential lead field calculated using the  
287 boundary element method [49] on the MNI152 template [50]. The cortical grey matter is  
288 partitioned into 6239 voxels at 5 mm spatial resolution. sLORETA images represent the  
289 standardized electric activity at each voxel in Montreal Neurological Institute (MNI) space  
290 as the exact magnitude of the estimated current density. Anatomical labels are reported  
291 using an appropriate correction from MNI to Talairach space [51] using Talairach Daemon  
292 [52]. For further details on sLORETA refer to [http://www.uzh.ch/keyinst/NewLORETA/  
293 Methods/MethodsSloreata](http://www.uzh.ch/keyinst/NewLORETA/Methods/MethodsSloreata). The source activity was estimated from the face-car difference  
294 wave post stimulus onset.

## 295 Results

### 296 Behavioural Results

297 The decisions taken by the subjects under the influence of a social cue was modeled as a  
298 2-component mixture model based on the shifted gamma and negative gamma distribution  
299 (see equations (3)–(5)). To verify that the proposed model fits the observed behaviour data  
300 well, the Kolmogorov-Smirnov (KS) test [42] was used. The proposed model captures the  
301 data correctly in most cases (see Table S1). Fig. 1B depicts the histogram of all  $(k_1, k_2)$   
302 pairing and the fitted density of our model for one subject. Table S1 contains the p-values  
303 corresponding to the cases where the model is rejected. In over 96% of the cases, the  
304 hypothesized model was accepted, thus proving the efficacy of the model.

305 To estimate the predictive performance of the proposed model and prevent possible over-  
306 fitting, the highest probability density region (HPDR) of the fitted model was computed  
307 based on the training data and checked whether the test data falls in the calculated HPDR.  
308 Table S2 showing mean prediction error rates across subjects, demonstrate that the cross-  
309 validation error rate never exceeds 5% for any fold thus validating the excellent performance  
310 of the model in terms of prediction and nullifying the chance of over-fitting. Fig. 2A shows  
311 a fitted density function and the corresponding HPDR calculated from the training data  
312 of a particular validation fold of one subject. The test data as seen from the figure falls  
313 convincingly inside the indicated HPDR.

314 Gaussian distribution has been previously used to model behavioural data successfully  
315 [37]. Hence the proposed model was compared with the mixture of two component Gaussian  
316 distributions. The median of the likelihood ratios across subjects for a given  $(k_1, k_2)$  in all  
317 but 2 cases (out of 30) clearly indicates that the proposed model outperforms the Gaussian  
318 mixture model in terms of explaining the data (refer to Table S3).

### 319 Effect of Social Cues on Individual Choice

320 Effect of social cues on individual decision was studied using a distance metric between  $k_1$   
321 and the estimated modes of the fitted model (see equation (8)). Using bootstrap resampling  
322 technique on mean distance per  $(k_1, k_2)$  pair, it can be observed that post social cue, there  
323 is a significant shift in ratings when decisions from all subjects were pooled together (Table  
324 S4). Furthermore, to check whether this is also true for individual decisions, an additional  
325 analysis was carried out. If the proposed model predicted a mode in the direction of the  
326 social cue, the proportion of decisions in between  $k_1$  and  $k_2$  was calculated by integrating  
327 the estimated density within the said interval. It can be seen that a significant proportion of  
328 decisions, as assessed by our model, falls in between  $k_1$  and  $k_2$  (refer to Tables S5–S8), clearly  
329 suggesting that, in general, subjects tend to get influenced by the social choice, irrespective  
330 of whether it conforms to his/her individual bias or not.

### 331 Effect of Concurring Cues

332 In order to check whether the decision confidence increases when the subject was given a  
333 social cue which concurs with his/her own judgment, the area under the fitted density given

334 the social cue ('FF','CC') is compared with that of a neutral cue ('FC'/'CF') (see Tables  
335 S9 and S10). These areas are assumed to be indicative of the proportion of decisions of the  
336 subjects around the individual decision. As compared to the neutral cue, for most of the  
337 subjects the average proportion of decisions in the region [1, 6] is greater when individual  
338 choice is face and social cue is also face. Similarly, this proportion in the region [7, 11] is  
339 greater when individual and social choice both are car. Thus it can be concluded (refer to  
340 Fig. 2B) that decision confidence of most subjects increased when provided with a concurring  
341 social cue (FF/CC).

## 342 **Effect of Conflicting Cues**

343 Further analysis was carried out to check whether there is a significant reversal in the  
344 decisions when the subject faces a social cue contradictory to his/her individual decision.  
345 We say that there is a *cross-over* if there exists a mode in the opposite side of the decision  
346 boundary. Cross-over under the influence of concurring cues was found to be insignificant  
347 (in terms of area) compared to conflicting cues (see Table S14) and hence ignored. For  
348 every  $k_1$ , it is examined whether cross-over exists given a mismatch between social cue  
349 and individual choice. Using bootstrapping, it can be shown that the proportion of cross-  
350 over is significant among the individuals. This is evident from the approximate achieved  
351 significance level (ASL) [53] contained in Table S11. Fig. 2C distinctly reveals that the  
352 mean cross-over proportion increases with decrease in individual confidence, implying that  
353 in general subjects tend to be influenced more by contradictory social cues on images where  
354 their individual confidence was low. Refer to Tables S12 and S13 for the detailed list of  
355 cross-over proportions per subject.

## 356 **Ranking Subjects Based on Social Cues**

357 Individuals differ in the manner in which social information influences their perceptual  
358 decision. Using the proposed behavioural model, it is possible to rank the subjects based  
359 on the level of influence social cues had on their percept. Fig. 2D shows the ranking of  
360 subjects based on a measure, called as social bias score, that captures their tendency to be  
361 influenced by the social information. Based on the analysis, 8<sup>1</sup> subjects were chosen to be  
362 most affected by social cues and are referred as *chosen subjects* in the EEG analysis.

## 363 **Neural Results**

### 364 **ERP Analysis**

365 ERP analysis was performed on average referenced and baseline subtracted EEG signals  
366 for each condition. Epochs of a particular channel were marked noisy if their respective  
367 absolute differences from the median exceeded 5 times the interquartile range. Such noisy  
368 epochs were not considered for further ERP analysis. It is well-known that parieto-occipital  
369 electrodes show differential activity when perceiving faces and cars [54]. Several studies

---

<sup>1</sup>Out of the 17 subjects, 2 had only high confidence trials and hence not considered. Out of the 15 remaining, 8 were found to be significantly more affected by the social cues than the rest.

370 have hypothesized the role of the frontal cortex in choice manipulation under the influ-  
371 ence of social information ([8, 13, 15, 47]). To explore the effect of social cues on face/car  
372 percepts, ERP analysis was carried out with parieto-occipital and fronto-central electrodes  
373 separately. To elucidate whether different types of comments induce different neural process-  
374 ing mechanisms, the grand average difference waves were plotted (refer to Figs. S1 and S2)  
375 for correctly guessed face and car trials. Clearly a difference in face and car ERPs 200-350  
376 ms after stimulus onset is visible across both fronto-central and parieto-occipital electrodes.  
377 The trend is similar across all conditions.

### 378 **Single Trial Multivariate Analysis**

379 Pattern classifiers were used to analyze single trial EEG signals corresponding to the different  
380 types of social cues. To quantify the predictive accuracy of the classifier, the posterior  
381 probabilities obtained from 10 fold cross validation were used to calculate the area under  
382 the ROC curve (AUC). The AUCs were averaged across the subjects. The multivariate  
383 analysis was performed using the entire post-stimulus data and the AUCs were plotted  
384 corresponding to the different conditions. The classification accuracy appears to increase  
385 when the subject was provided with a cue that concurred with his/her individual guess  
386 and decrease when he/she was provided with a conflicting social cue. An overall increase  
387 in difference was noted between the conditions when an average over chosen subjects was  
388 considered (Fig. 3A). The pattern analysis was repeated across different time windows each  
389 having a length of 50 ms and AUCs corresponding to the late sensory period (200-450 ms  
390 after stimulus onset) are found to be significantly more than chance ( $p$ -value $<0.05$ , false  
391 discovery rate (FDR) corrected). Further analysis shows that the difference between AUCs  
392 of concurring and conflicting cues is statistically significant only in the time window 200–250  
393 ms ( $p$  value $<0.05$  FDR corrected). Fig. 3B clearly depicts that around 200 – 250 ms after  
394 stimulus onset, there is a sharp increase in the AUC value and the peak is more pronounced  
395 for concurring social cues.

396 Notably, prominent activity in fronto-central and occipito-temporal electrodes in similar  
397 time window was also observed during ERP analysis.

398 The plot of scalp topography on the basis of the classifier performances (see Fig. 3C) for  
399 individual electrodes seems to be consistent with the temporal findings (Fig. 3B). Around  
400 200-300 ms post stimulus onset we observe significant activity at the parieto-occipital regions  
401 and fronto-central regions, while other stages of processing shows no difference between  
402 the conditions. The classifier results demonstrate that social decisions have an effect on  
403 individual perceptual decision and it is most prominent around 200-300 ms post stimulus  
404 onset.

### 405 **Source Reconstruction Results**

406 Single trial multivariate data analysis and ERP analysis revealed prominent discriminatory  
407 activity post 170 ms stimulus onset. Source estimates identified more frontal activity under  
408 the influence of conflicting cues than concurring cues (refer to figure 4 ). Frontal sources  
409 seem to to be primarily responsible for generating differences in the ERP waveforms of

410 face and car trials across the whole neural timeline for conflicting trials while a prominent  
411 fronto-parietal interplay was noticed in case of concurring and neutral trials. Particularly,  
412 the medial frontal gyrus seems to have contributed significantly in presence of conflicting  
413 cues, in line with previous studies which also highlight the role of medial frontal cortex  
414 during social conformity and cognitive dissonance.

## 415 **Neural Analysis of Cue Data**

416 We did an additional analysis where we extracted the EEG signals locked to the cue onset.  
417 The 500 ms post-cue onset data were used to perform multivariate pattern analysis for  
418 exploring the effects of expectation on early sensory processing. If the cues had an effect on  
419 the sensory signals then we would expect a higher classification rate for images selected as  
420 faces post cue-onset when preceded by an ‘FF’ cue and vice versa for ‘CC’ cues. However,  
421 pattern analysis of cue-data revealed no such trends (refer to Fig. 5). Similar chance  
422 performance was also observed in pre-stimulus and early post-stimulus (< 200 ms) neural  
423 classification.

## 424 **Discussion**

425 How social decision affects individual decision making have been explored in social psychol-  
426 ogy since 1940’s starting with research on social conformity by Solomon Asch [5, 6, 16] and  
427 with the advent of social media, there has been a renewed interest in social cues influencing  
428 our decision [1–4]. In the current study, how people respond to social cues when performing  
429 a perceptual decision making task was explored systematically. The neural mechanism of  
430 the decision making process was studied while the subjects used the social cues in form  
431 of two other well performing subjects’ decision, to perceive noisy images of faces and cars.  
432 Although the social cues shown to the subject were non-informative with equal number of  
433 FF, neutral and CC cues per stimuli displayed in random order, they were found to be  
434 successful in manipulating the percept. Most of the studies on social influence require deci-  
435 sion with and without social cues sequentially but we demonstrate that irrespective of the  
436 order in which the stimulus/cue was presented, social cues always have similar effect on our  
437 individual decision making. We conclude that the perceptual decision of the subject under  
438 the influence of the social cue depends on two factors - his/her individual perception of the  
439 image as is reflected in his/her confidence ratings on the same images without any social  
440 cue and the social information presented to him/her. It is observed that the distribution of  
441 confidence ratings under the influence of a social cue is bi-modal in nature with one mode  
442 corresponding to individual decision while other due to social cue (Fig. 2A), with a sig-  
443 nificant proportion in the direction of the social cue. So we can safely infer that although  
444 there was a general tendency to adhere to one’s individual decision, but subjects’ decision  
445 confidence could be altered with social influence. This shift in decision confidence varied  
446 between the subjects as reported in previous studies [1]. Using the proposed computational  
447 model, the heterogeneity of the influence of social cues on the subjects’ decision was quan-  
448 tified successfully. The subjects were ranked based on the influence the social cues elicited  
449 and the findings used in subsequent neural analysis produced encouraging results.

450 Although social influence on perceptual decisions remains a highly researched topic, but  
451 the neural mediators of manipulation of perceptual decisions with social influence remains  
452 largely unexplored [8, 13, 15, 47]. We identified a sharp peak in the mean AUC value 200-300  
453 ms post stimulus onset which is most prominent in concurring cues. This seems to imply  
454 that the classifier could identify the class-specific discriminatory activity and predict the  
455 observers decision more accurately when the cue received matched with his/her individual  
456 perception, in line with our claim that the subjects were more sure about their decisions when  
457 the stimulus was preceded by a concurring cue. The effect is more well-defined in case of car  
458 trials (refer to Fig. S1 and S2), probably arising out of heavier mental load for car images  
459 than faces, since humans are adept at face perception [55]. Almost all the neuroimaging  
460 studies using social cues suggest the role of posterior medial frontal cortex (pmMFC) and  
461 ventral striatum [8, 12, 15] especially upon presenting conflicting opinions but the neural  
462 time line remains poorly understood. Source analysis of ERP signals using conflicting cues  
463 in our experiment also shows activity in the medial frontal cortex (MFC) as early as 170  
464 ms post stimulus onset. Neural signals following conflicting cues displayed comparatively  
465 greater frontal activity than concurring and neutral cues possibly suggesting greater top  
466 down processing of information when cues mismatch perceptual choice. It is particularly  
467 interesting to note that MFC is active around the same time interval that coincides with  
468 the well established N170 component which is known to account for difference between  
469 face and car [56]. Possibly the mismatch between social decisions produced by the cue  
470 and the percept triggered activity in the MFC which has been reported to play a role in  
471 social conformity [12, 18]. Medial frontal cortex perhaps generates a signal that encodes  
472 the difference between individual percept based on the stimulus and the group decision  
473 given by the social cues. Absence of frontal activity in concurrent cues in the same time  
474 interval further supports our claim. The strength of MFC activity most likely results in the  
475 subsequent adjustment of individual choice. Hence the source localization effects were more  
476 pronounced for chosen subjects. Our results seem to suggest that irrespective of individual  
477 decision making, similar neural circuitry seems to play a role in making perceptual decision  
478 under the influence of social cues.

479 There has been extensive research on face and object perception in the last few decades  
480 revealing significant involvement of various occipito-parietal regions in the early stages of  
481 visual processing ( $< 200$  ms) [54]. However in our study, probing into the neural time  
482 series unveiled no significant differences in perception under the influence of different social  
483 cues during early stages. There have been a significant body of work citing that stimulus  
484 expectation leads to changes in early sensory processing [24–34]. However recent studies  
485 have questioned the role of neural expectation in sensory cortex [35, 36]. We systematically  
486 analyzed the effect of social decision and found no significant effect of the social cues before  
487 stimulus onset, post cue onset and immediately following stimulus onset. We extracted the  
488 neural data locked to cue presentation and used multivariate pattern classifier on the cue  
489 data alone to show that the cue data were not indicative of any expectation based effect on  
490 the stimuli (see Fig. 5). Early expectation-related effect was not seen when the stimulus  
491 was displayed as shown in studies using predictive cues [57] and our results clearly suggest  
492 that expectation by virtue of social influence does not affect early sensory processing. It is  
493 worthwhile to note here that our cues were essentially social decisions of others instead of

494 cues predictive about the stimulus itself [57, 58] and could possibly explain the lack of top-  
495 down expectation signals seen in early sensory cortex in previous studies [24, 34, 57]. Our  
496 results seem to suggest that role of downstream processing in using the social information  
497 from the cue provided, similar to the concept of Bayesian Decision Theory [59] and Signal  
498 Detection Theory [60, 61].

499 Overall we conclude that perceptual decision and confidence is influenced by social cues  
500 and it is possible to compute the extent of influence using statistical modeling. Neural data  
501 analysis alludes to a role of a medial frontal cortex affecting perceptual decision under social  
502 influence. We found no expectation-related bias in early sensory processing using social  
503 information cues. Future studies can possibly focus on experiments using actual social  
504 groups to validate the neural results found in the current research.

## 505 Acknowledgment

506 This work is funded by CSRI-DST, and DST-INSPIRE, Government of India.

## 507 References

- 508 [1] Bertrand Jayles, Hye-rin Kim, Ramón Escobedo, Stéphane Cezera, Adrien Blanchet,  
509 Tatsuya Kameda, Clément Sire, and Guy Theraulaz. How social information can im-  
510 prove estimation accuracy in human groups. *Proceedings of the National Academy of*  
511 *Sciences*, pages 12620–12625, 2017.
- 512 [2] Bernard J Jansen, Mimi Zhang, Kate Sobel, and Abdur Chowdury. Twitter power:  
513 Tweets as electronic word of mouth. *Journal of the American society for information*  
514 *science and technology*, 60(11):2169–2188, 2009.
- 515 [3] B. Gonçalves and N. Perra. *Social Phenomena: From Data Analysis to Models*. Compu-  
516 tational Social Sciences. Springer International Publishing, 2015. ISBN 9783319140117.
- 517 [4] Robert M Bond, Christopher J Fariss, Jason J Jones, Adam DI Kramer, Cameron  
518 Marlow, Jaime E Settle, and James H Fowler. A 61-million-person experiment in social  
519 influence and political mobilization. *Nature*, 489(7415):295–298, 2012.
- 520 [5] Solomon E Asch. Opinions and social pressure. *Scientific American*, 193(5):31–35,  
521 1955.
- 522 [6] Solomon E Asch and H Guetzkow. Effects of group pressure upon the modification and  
523 distortion of judgments. *Groups, leadership, and men*, pages 222–236, 1951.
- 524 [7] GS Berns, J Chappelow, CF Zink, G Pagnoni, ME Martin-Skurski, and J Richards.  
525 Neurobiological correlates of social conformity and independence during mental rota-  
526 tion. *Neuropsychopharmacology*, 29:S77–S77, 2004.



- 527 [8] Gregory S Berns, C Monica Capra, Sara Moore, and Charles Noussair. Neural mecha-  
528 nisms of the influence of popularity on adolescent ratings of music. *NeuroImage*, 2010.
- 529 [9] Timothy EJ Behrens, Laurence T Hunt, Mark W Woolrich, and Matthew FS Rush-  
530 worth. Associative learning of social value. *Nature*, 456(7219):245, 2008.
- 531 [10] Guido Biele, Jörg Rieskamp, Lea K Krugel, and Hauke R Heekeren. The neural basis  
532 of following advice. *PLoS biology*, 9(6):e1001089, 2011.
- 533 [11] Vasily Klucharev, Ale Smidts, and Guillén Fernández. Brain mechanisms of persua-  
534 sion: how expert powermodulates memory and attitudes. *Social cognitive and affective*  
535 *neuroscience*, 3(4):353–366, 2008.
- 536 [12] Vasily Klucharev, Kaisa Hytönen, Mark Rijpkema, Ale Smidts, and Guillén Fernández.  
537 Reinforcement learning signal predicts social conformity. *Neuron*, 61(1):140–151, 2009.
- 538 [13] Vasily Klucharev, Moniek AM Munneke, Ale Smidts, and Guillén Fernández. Down-  
539 regulation of the posterior medial frontal cortex prevents social conformity. *Journal of*  
540 *Neuroscience*, 31(33):11934–11940, 2011.
- 541 [14] Daniel K Campbell-Meiklejohn, Dominik R Bach, Andreas Roepstorff, Raymond J  
542 Dolan, and Chris D Frith. How the opinion of others affects our valuation of objects.  
543 *Current Biology*, 20(13):1165–1170, 2010.
- 544 [15] Keise Izuma and Ralph Adolphs. Social manipulation of preference in the human brain.  
545 *Neuron*, 78(3):563–573, 2013.
- 546 [16] Henri Tajfel. Social psychology of intergroup relations. *Annual review of psychology*,  
547 33(1):1–39, 1982.
- 548 [17] Robert B. Cialdini and Noah J. Goldstein. Social influence: Compliance and conformity.  
549 *Annual Review of Psychology*, 55(1):591–621, 2004. doi: 10.1146/annurev.psych.55.  
550 090902.142015. PMID: 14744228.
- 551 [18] Keise Izuma. The neural basis of social influence and attitude change. *Current opinion*  
552 *in neurobiology*, 23(3):456–462, 2013.
- 553 [19] Iain D Couzin. Collective cognition in animal groups. *Trends in cognitive sciences*, 13  
554 (1):36–43, 2009.
- 555 [20] Larissa Conradt and Christian List. Group decisions in humans and animals: a survey.  
556 *Philosophical Transactions of the Royal Society of London B: Biological Sciences*, 364  
557 (1518):719–742, 2009.
- 558 [21] Andrew M Simons. Many wrongs: the advantage of group navigation. *Trends in ecology*  
559 *& evolution*, 19(9):453–455, 2004.
- 560 [22] Francis Galton. Vox populi. *Nature*, 75(7):450–451, 1907.

- 561 [23] J. Surowiecki. *The Wisdom of Crowds*. Knopf Doubleday Publishing Group, 2005.  
562 ISBN 9780307275059.
- 563 [24] Peter Kok, Gijs Joost Brouwer, Marcel AJ van Gerven, and Floris P de Lange. Prior  
564 expectations bias sensory representations in visual cortex. *Journal of Neuroscience*, 33  
565 (41):16275–16284, 2013.
- 566 [25] Maxine T Sherman, Ryota Kanai, Anil K Seth, and Rufin VanRullen. Rhythmic influ-  
567 ence of top-down perceptual priors in the phase of prestimulus occipital alpha oscilla-  
568 tions. *Journal of cognitive neuroscience*, 28(9):1318–1330, 2016.
- 569 [26] Ana Todorovic, Jan-Mathijs Schoffelen, Freek van Ede, Eric Maris, and Floris P  
570 de Lange. Temporal expectation and attention jointly modulate auditory oscillatory  
571 activity in the beta band. *PLoS One*, 10(3):e0120288, 2015.
- 572 [27] Elexa St John-Saaltink, Christian Utzerath, Peter Kok, Hakwan C Lau, and Floris P  
573 De Lange. Expectation suppression in early visual cortex depends on task set. *PLoS*  
574 *One*, 10(6):e0131172, 2015.
- 575 [28] Peter Kok, Dobromir Rahnev, Janneke FM Jehee, Hakwan C Lau, and Floris P  
576 De Lange. Attention reverses the effect of prediction in silencing sensory signals. *Cere-*  
577 *bral cortex*, 22(9):2197–2206, 2012.
- 578 [29] Peter Kok, Janneke FM Jehee, and Floris P De Lange. Less is more: expectation  
579 sharpens representations in the primary visual cortex. *Neuron*, 75(2):265–270, 2012.
- 580 [30] Jiefeng Jiang, Christopher Summerfield, and Tobias Egner. Attention sharpens the  
581 distinction between expected and unexpected percepts in the visual brain. *Journal of*  
582 *Neuroscience*, 33(47):18438–18447, 2013.
- 583 [31] Katrina Carlsson, Predrag Petrovic, Stefan Skare, Karl Magnus Petersson, and Martin  
584 Ingvar. Tickling expectations: neural processing in anticipation of a sensory stimulus.  
585 *Journal of cognitive neuroscience*, 12(4):691–703, 2000.
- 586 [32] Peter Kok, Lieke Lf Van Lieshout, and Floris P De Lange. Local expectation violations  
587 result in global activity gain in primary visual cortex. *Scientific reports*, 6:37706, 2016.
- 588 [33] Peter Kok, Pim Mostert, and Floris P De Lange. Prior expectations induce prestimulus  
589 sensory templates. *Proceedings of the National Academy of Sciences*, page 201705652,  
590 2017.
- 591 [34] Peter Kok, Michel F Failing, and Floris P de Lange. Prior expectations evoke stimulus  
592 templates in the primary visual cortex. *Journal of Cognitive Neuroscience*, 26(7):1546–  
593 1554, 2014.
- 594 [35] Nuttida Rungratsameetaweemana, Sirawaj Itthipuripat, Annalisa Salazar, and John T  
595 Serences. Expectations do not alter early sensory processing during perceptual decision  
596 making. *Journal of Neuroscience*, pages 3638–17, 2018.

- 597 [36] Ji Won Bang and Dobromir Rahnev. Stimulus expectation alters decision criterion but  
598 not sensory signal in perceptual decision making. *Scientific reports*, 7(1):17072, 2017.
- 599 [37] Seongmin A Park, Sidney Goïame, David A O’Connor, and Jean-Claude Dreher. Inte-  
600 gration of individual and social information for decision-making in groups of different  
601 sizes. *PLoS Biology*, 15(6):1–28, 2017.
- 602 [38] Nikolaus F Troje and Heinrich H Bülthoff. Face recognition under varying poses: The  
603 role of texture and shape. *Vision research*, 36(12):1761–1772, 1996.
- 604 [39] Charalampos Chaniailidis. *Bayesian mixture models for count data*. PhD thesis, Uni-  
605 versity of Glasgow, 2015.
- 606 [40] G. Casella and R.L. Berger. *Statistical Inference*. Duxbury advanced series in statistics  
607 and decision sciences. Thomson Learning, 2002. ISBN 9780534243128.
- 608 [41] K.E. Atkinson. *An introduction to numerical analysis*. Wiley, 1978. ISBN  
609 9780471029854.
- 610 [42] J.D. Gibbons and S. Chakraborti. *Nonparametric Statistical Inference*. Taylor & Fran-  
611 cis, 2011. ISBN 9781420077612 - CAT C7619.
- 612 [43] P.H. Westfall, P.H.W. S. Stanley Young, and S.S. Young. *Resampling-Based Multiple*  
613 *Testing: Examples and Methods for P-Value Adjustment*. A Wiley-Interscience publi-  
614 cation. Wiley, 1993. ISBN 9780471557616.
- 615 [44] Rob J Hyndman. Computing and graphing highest density regions. *The American*  
616 *Statistician*, 50(2):120–126, 1996.
- 617 [45] Koel Das and Zoran Nenadic. An efficient discriminant-based solution for small sample  
618 size problem. *Pattern Recognition*, 42:857–866, 2009.
- 619 [46] Richard O Duda, Peter E Hart, and David G Stork. *Pattern classification*. John Wiley  
620 & Sons, 2012.
- 621 [47] Simon J Mason and Nicholas E Graham. Areas beneath the relative operating char-  
622 acteristics (roc) and relative operating levels (rol) curves: Statistical significance and  
623 interpretation. *Quarterly Journal of the Royal Meteorological Society*, 128(584):2145–  
624 2166, 2002.
- 625 [48] Roberto Domingo Pascual-Marqui et al. Standardized low-resolution brain electromag-  
626 netic tomography (sloreta): technical details. *Methods Find Exp Clin Pharmacol*, 24  
627 (Suppl D):5–12, 2002.
- 628 [49] Manfred Fuchs, Jörn Kastner, Michael Wagner, Susan Hawes, and John S Ebersole. A  
629 standardized boundary element method volume conductor model. *Clinical Neurophys-*  
630 *iology*, 113(5):702–712, 2002.

- 631 [50] John Mazziotta, Arthur Toga, Alan Evans, Peter Fox, Jack Lancaster, Karl Zilles,  
632 Roger Woods, Tomas Paus, Gregory Simpson, Bruce Pike, et al. A probabilistic atlas  
633 and reference system for the human brain: International consortium for brain map-  
634 ping (icbm). *Philosophical Transactions of the Royal Society of London B: Biological*  
635 *Sciences*, 356(1412):1293–1322, 2001.
- 636 [51] J Talairach and P Tournoux. Co-planar stereotaxic atlas of the human brain: 3-d  
637 proportional system: An approach to cerebral imaging (thieme classics). *Thieme*, 1988.
- 638 [52] Jack L Lancaster, Marty G Woldorff, Lawrence M Parsons, Mario Liotti, Catarina S  
639 Freitas, Lacy Rainey, Peter V Kochunov, Dan Nickerson, Shawn A Mikiten, and Peter T  
640 Fox. Automated talairach atlas labels for functional brain mapping. *Human brain*  
641 *mapping*, 10(3):120–131, 2000.
- 642 [53] B. Efron and R.J. Tibshirani. *An Introduction to the Bootstrap*. Chapman & Hall/CRC  
643 Monographs on Statistics & Applied Probability. Taylor & Francis, 1994. ISBN  
644 9780412042317.
- 645 [54] Bruno Rossion, Carrie A Joyce, Garrison W Cottrell, and Michael J Tarr. Early lat-  
646 eralization and orientation tuning for face, word, and object processing in the visual  
647 cortex. *Neuroimage*, 20(3):1609–1624, 2003.
- 648 [55] David A Leopold and Gillian Rhodes. A comparative view of face perception. *Journal*  
649 *of Comparative Psychology*, 124(3):233–251, 2010.
- 650 [56] Sharon Daniel and Shlomo Bentin. Age-related changes in processing faces from detec-  
651 tion to identification: Erp evidence. *Neurobiology of Aging*, 33(1):206–e1, 2012.
- 652 [57] Christopher Summerfield and Floris P De Lange. Expectation in perceptual decision  
653 making: neural and computational mechanisms. *Nature Reviews Neuroscience*, 15(11):  
654 745–756, 2014.
- 655 [58] Christopher Summerfield and Etienne Koechlin. A neural representation of prior infor-  
656 mation during perceptual inference. *Neuron*, 59(2):336–347, 2008.
- 657 [59] Laurence T Maloney and Pascal Mamassian. Bayesian decision theory as a model of  
658 human visual perception: Testing bayesian transfer. *Visual neuroscience*, 26(1):147–  
659 155, 2009.
- 660 [60] D.M. Green and J.A. Swets. *Signal Detection Theory and Psychophysics*. Peninsula  
661 Pub., 1988. ISBN 9780932146236.
- 662 [61] Neil A Macmillan and C Douglas Creelman. *Detection theory: A user’s guide*. Psy-  
663 chology press, 2004.

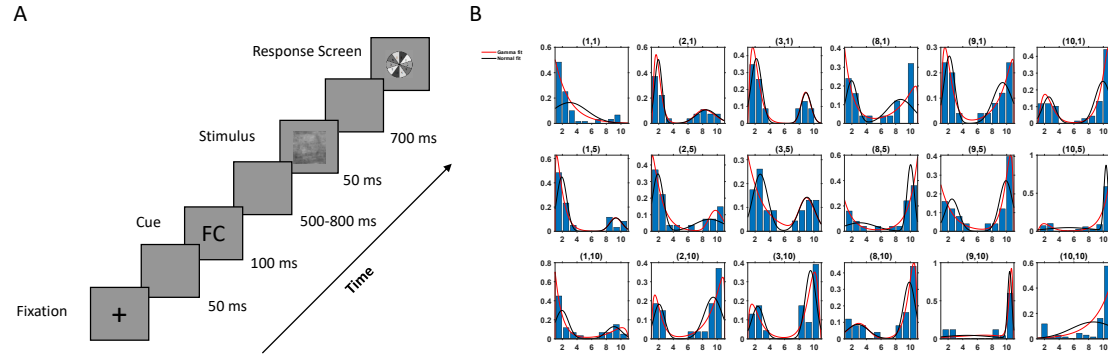

Figure 1: Experimental protocol and behavioral response. (A) Experimental Paradigm. (B) Histogram of the observed data and fitted density of the proposed model (red) and Gaussian mixture model (black) for a subject for different combinations of  $k_1$ ,  $k_2$  (denoted on top of each case, e.g. (1,10) implies subject data and fitted model for the images when individual choice was 1 denoting face with highest confidence and social cue was CC ).

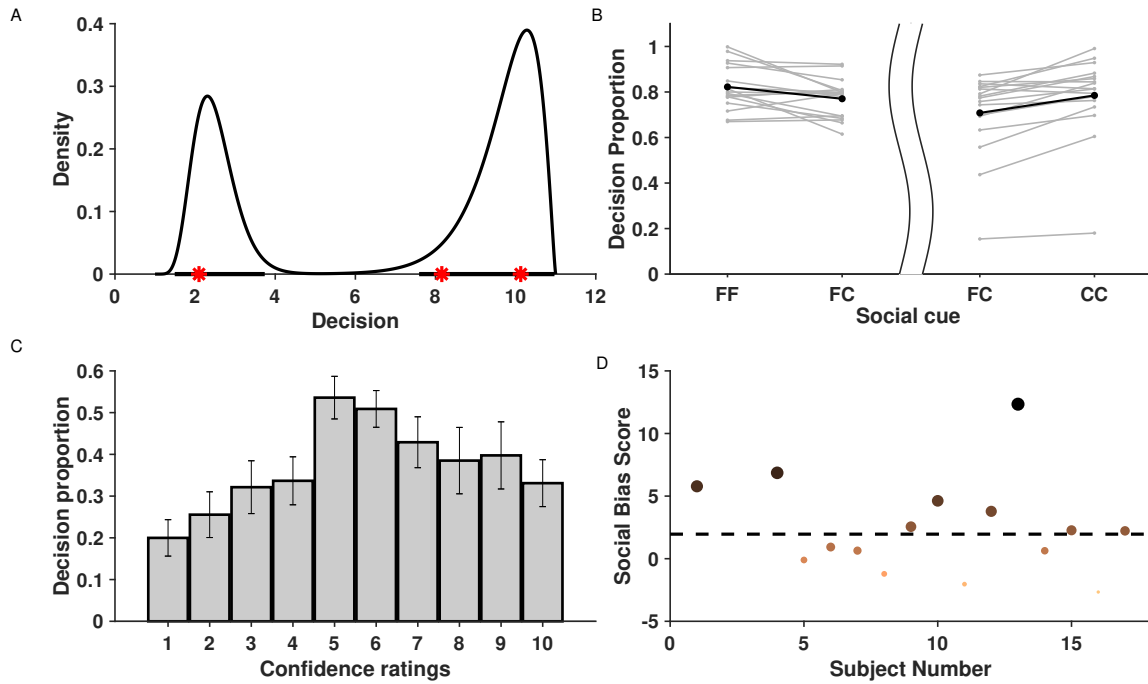

Figure 2: Behavioral Data Analysis. (A) Estimated probability density function based on the training data set shown for one subject when  $k_1 = 3$  and  $k_2 = 10$ . Bold lines in x-axis represent the 85% HPDR and red stars represent the test observations for a subject. The test observations fall within the HPDR. (B) Figure depicts increase in average proportions of decisions when viewing concurring cues than when viewing neutral cues. The left part of the figure considers cases when the individual decision was face while the right part considers cases when it was car. The bold dots depict the average across the individuals. (C) Mean proportion of decisions towards conflicting cues across individuals who had crossovers given the individual decision. Figure shows that crossover happens for all cases and is most prominent when individual decision confidence is low (5,6). Error bars denote  $\pm$  SD. (D) Social bias ranking of subjects indicating their tendency to be influenced by social cue shown. Larger and darker dots indicate subjects having greater social influence. The dotted line parallel to the x-axis depicts the significance level.

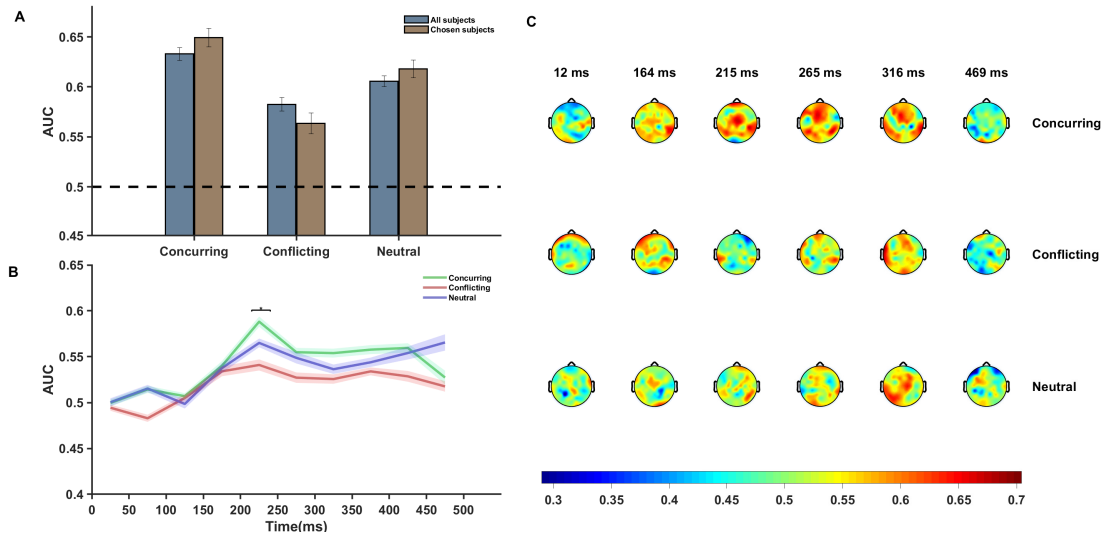

Figure 3: Neural Data Analysis. **(A)** Figure shows average AUC predicting choice probability using single trial EEG analysis using multivariate pattern analysis. Average AUC increases under the influence of concurring comment and decreases under the influence of conflicting comment as compared to that for neutral comments in all our subjects. The effect is more prominent in case of the chosen subjects. Error Bars indicate  $\pm$  SEM. **(B)** Plot of average AUC across all subjects at different time points. The increase in AUC is most pronounced in the 200-300 ms post stimulus interval. **(C)** Topoplot of one subject showing spatio-temporal discriminability under different cue conditions. Average AUC of the all channels for successive time windows are shown. There appears to be a significant involvement of the frontal and occipital electrodes 200-350 ms post stimuli onset, specially in images with concurring cues.

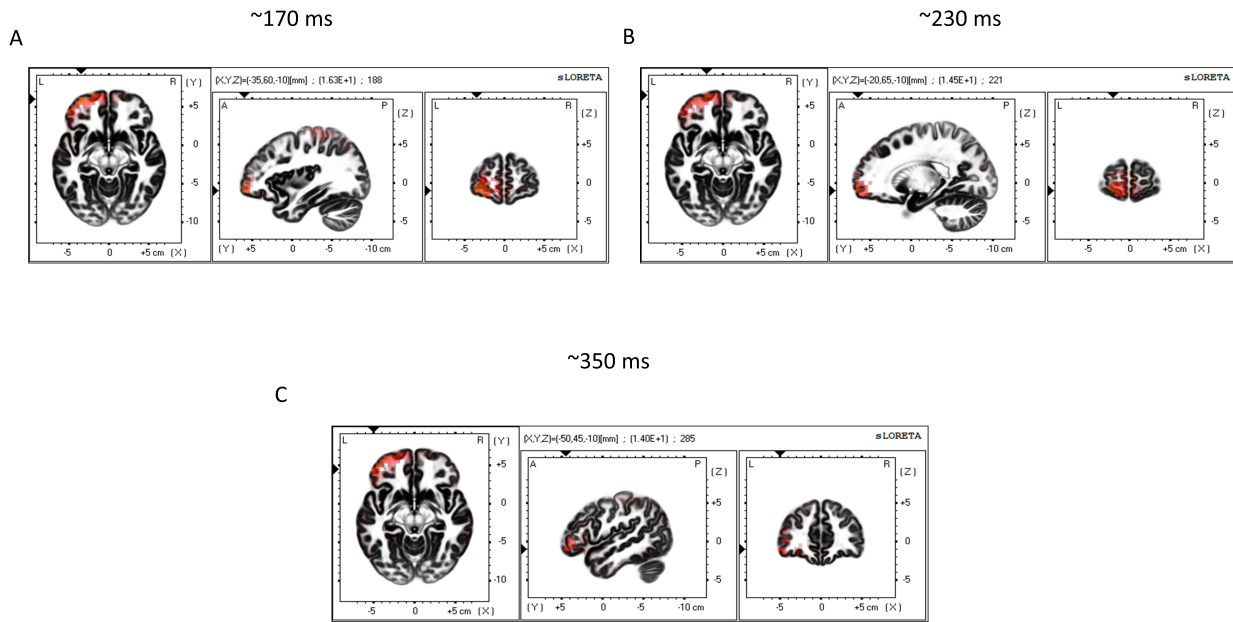

Figure 4: Source Reconstruction. (A), (B) and (C) Figures show sources estimated at 170, 230 ms and 350 ms using sLORETA software for trials with conflicting cues.

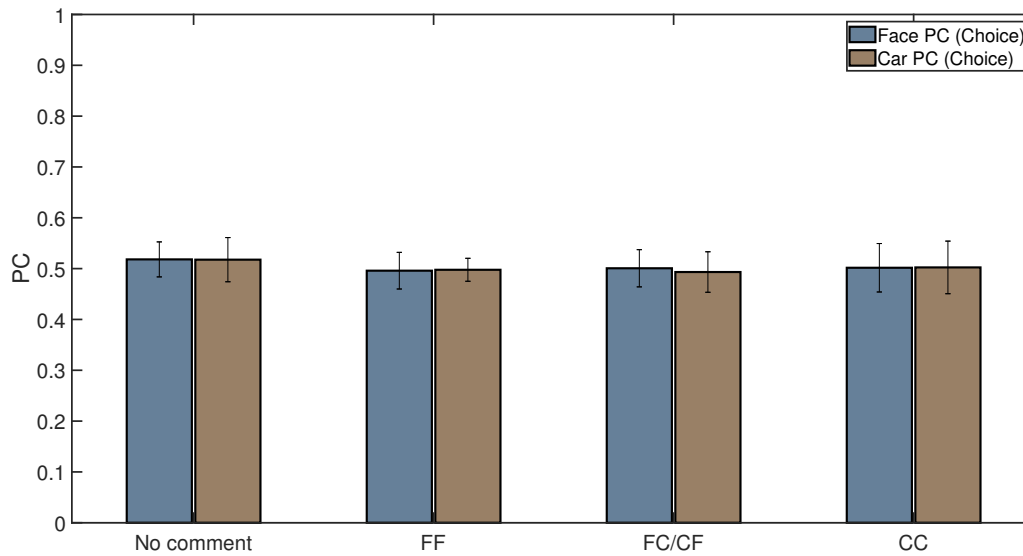

Figure 5: Figure shows percentage of correctly classified face and car decisions for the 4 kinds of comments shown on screen on the basis of their neural signals after cue exposure. This clearly shows that subject choice did not arise from cue-related expectation bias.



## Supplementary Information

### Calculation of Cumulative Distribution Function

The cdf  $G(\cdot)$  of the shifted gamma distribution (equation (1)) is given by  $G(y) = 0$ , if  $y \leq 1$ , otherwise,

$$\begin{aligned} G(y) &= \int_{-\infty}^y \frac{\beta^\alpha}{\Gamma(\alpha)} (x-1)^{(\alpha-1)} e^{-\beta(x-1)} I_{[1,\infty)}(x) dx \\ &= \int_1^y \frac{\beta^\alpha}{\Gamma(\alpha)} (x-1)^{(\alpha-1)} e^{-\beta(x-1)} dx \\ &= \int_0^{y-1} \frac{\beta^\alpha}{\Gamma(\alpha)} (z)^{(\alpha-1)} e^{-\beta(z)} dz \\ &= \Gamma\left(y-1, \alpha, \frac{1}{\beta}\right). \end{aligned}$$

The cdf  $Ng(\cdot)$  of the negative gamma distribution (equation (2)) for  $y \leq L$  is given by

$$\begin{aligned} Ng(y) &= \int_{-\infty}^y \frac{\beta^\alpha}{\Gamma(\alpha)} (L-x)^{(\alpha-1)} e^{-\beta(L-x)} I_{(-\infty,L]}(x) dx \\ &= \int_{L-y}^{\infty} \frac{\beta^\alpha}{\Gamma(\alpha)} z^{(\alpha-1)} e^{-\beta(z)} dz \\ &= 1 - \Gamma\left(L-y, \alpha, \frac{1}{\beta}\right), \end{aligned}$$

and  $Ng(y) = 1$ , otherwise. Here

$$I_A(x) = \begin{cases} 1 & \text{if } x \in A, \\ 0 & \text{otherwise,} \end{cases}$$

and  $\Gamma(x, \alpha, \frac{1}{\beta})$  is the cdf of the standard gamma distribution with shape parameter  $\alpha$  and scale parameter  $1/\beta$ .

### Calculation of Mode

It can be easily shown that the mode of the shifted gamma distribution is given by

$$M_g = 1 + \frac{\alpha-1}{\beta}.$$

For finding the mode of the negative gamma distribution we start by taking the logarithm of its density (equation (2)),

$$\ln(ng(x)) = \alpha \ln(\beta) - \ln(\Gamma(\alpha)) + (\alpha-1) \ln(L-y) - \beta(L-y).$$

Differentiating with respect to  $x$  and equating to zero, we get the mode to be

$$L - \frac{\alpha-1}{\beta}.$$

### One Sample Hypothesis Testing using Bootstrap

Suppose we want to test the null hypothesis ( $H_0$ ) about a parameter  $\theta$  of the distribution  $F$  based on a random sample  $x_1, \dots, x_n$ . Further assume that the statistical test is done based on a test statistic  $T$ , measuring the discrepancy between the data and the null hypothesis, such that large values of  $T$  indicating evidence against  $H_0$ . Let the observed value of statistic be given by  $t$ . Then the achieved significance level is defined as

$$ASL = P(T \geq t | H_0).$$

We estimate the ASL using bootstrap resampling technique. Small value of ASL show the evidence against the null hypothesis.

Table S1: Cases per subject where the proposed model was rejected using KS test (using Holm-Bonferroni correction) with FWER 0.05

| Subject | p-value | $k_1$ | $k_2$ |
|---------|---------|-------|-------|
| 1       | 0.0011  | 10    | 10    |
| 2       | —       | —     | —     |
| 3       | 0.0000  | 10    | 10    |
|         | 0.0000  | 1     | 1     |
|         | 0.0384  | 10    | 5     |
| 4       | 0.0000  | 10    | 10    |
|         | 0.0000  | 1     | 1     |
|         | 0.0143  | 1     | 10    |
| 5       | —       | —     | —     |
| 6       | —       | —     | —     |
| 7       | 0.0011  | 1     | 1     |
| 8       | —       | —     | —     |
| 9       | —       | —     | —     |
| 10      | 0.0000  | 10    | 10    |
|         | 0.0004  | 5     | 5     |
| 11      | 0.0000  | 1     | 1     |
|         | 0.0000  | 10    | 10    |
| 12      | —       | —     | —     |
| 13      | —       | —     | —     |
| 14      | —       | —     | —     |
| 15      | —       | —     | —     |
| 16      | 0.0000  | 1     | 1     |
|         | 0.0000  | 10    | 10    |
| 17      | —       | —     | —     |

The subjects are marked as ‘—’ when the KS test failed to reject any of its cases. Clearly in more than 96% of the cases our proposed models are accepted.

Table S2: Mean prediction error rate across subjects using 10-fold cross validation

| $k_1 \backslash k_2$ | 1      | 5      | 10     |
|----------------------|--------|--------|--------|
| 1                    | 0.0115 | 0.0108 | 0.0028 |
| 2                    | 0.0143 | 0.0036 | 0.0048 |
| 3                    | 0      | 0.0074 | 0.0056 |
| 4                    | 0.0262 | 0.0167 | 0.0071 |
| 5                    | 0.0132 | 0.0153 | 0.0083 |
| 6                    | 0.0038 | 0.0038 | 0.0083 |
| 7                    | 0.0094 | 0.0021 | 0      |
| 8                    | 0      | 0.0056 | 0.0167 |
| 9                    | 0      | 0.0071 | 0.0119 |
| 10                   | 0.0064 | 0.0105 | 0.0244 |

As evident from the table, the mean prediction error rate never exceeds 5%.

Table S3: Median of likelihood ratio between the proposed model and the Gaussian mixture model across subjects

| $k_1 \backslash k_2$ | 1           | 5             | 10       |
|----------------------|-------------|---------------|----------|
| 1                    | 173728.1573 | 3.3977        | 6.6146   |
| 2                    | 2.7082      | 2.8670        | 4.6755   |
| 3                    | 2.5848      | 1.6723        | 1.5284   |
| 4                    | 1.0451      | 1.9498        | 1.4990   |
| 5                    | 1.4201      | <b>0.9932</b> | 2.0759   |
| 6                    | 1.2763      | 1.3454        | 1.3324   |
| 7                    | 1.0303      | <b>0.9708</b> | 1.7591   |
| 8                    | 1.0961      | 1.4150        | 1.1443   |
| 9                    | 2.7505      | 1.8096        | 1.5784   |
| 10                   | 28.7567     | 8.0835        | 288.6886 |

In all but 2 (marked in bold) cases our model surpasses the Gaussian mixture model by a clear margin.

Table S4: Approximate achieved significance level (ASL) for testing the shift from individual decision across the subjects

| $k_1 \backslash k_2$ | 1            | 5     | 10    |
|----------------------|--------------|-------|-------|
| 1                    | <b>0.091</b> | 0     | 0     |
| 2                    | 0            | 0     | 0     |
| 3                    | 0            | 0     | 0     |
| 4                    | 0            | 0     | 0.003 |
| 5                    | 0            | 0.005 | 0     |
| 6                    | 0            | 0.003 | 0     |
| 7                    | 0.001        | 0.001 | 0     |
| 8                    | 0            | 0     | 0.002 |
| 9                    | 0            | 0     | 0.003 |
| 10                   | 0            | 0     | 0     |

Lower the ASL more the evidence against the null hypothesis that there is no shift from the individual decision under the influence of a social cue. It is clear that in all but one case (marked in bold) the ASL is less than 0.05.

Table S5: Proportion of decisions between  $k_1$  and  $k_2$  under the fitted model, for  $k_1 \in \{3, 4, 5\}$  and  $k_2 = 1$

| sub $\backslash k_1$ | 3      | 4      | 5      |
|----------------------|--------|--------|--------|
| 1                    | 0.6016 | —      | —      |
| 2                    | —      | —      | —      |
| 3                    | —      | —      | —      |
| 4                    | —      | —      | 0.7984 |
| 5                    | 0.4462 | 0.1880 | 0.3729 |
| 6                    | 0.1731 | 0.4863 | 0.5574 |
| 7                    | —      | 0.6340 | 0.3930 |
| 8                    | —      | —      | 0.4038 |
| 9                    | 0.3790 | 0.5146 | 0.6252 |
| 10                   | —      | —      | 0.5781 |
| 11                   | —      | —      | 0.2888 |
| 12                   | 0.5393 | 0.4024 | —      |
| 13                   | 0.7808 | —      | 0.9219 |
| 14                   | 0.3700 | 0.5984 | 0.6185 |
| 15                   | 0.3991 | 0.4726 | 0.3306 |
| 16                   | —      | —      | 0.4002 |
| 17                   | 0.6201 | —      | —      |

The cases marked ‘—’ were not considered due to very few observations for that  $(k_1, k_2)$  pair. In all other cases, there was the existence of a mode in the direction of  $k_2$ .

Table S6: Proportion of decisions between  $k_1$  and  $k_2$  under the fitted model, for  $k_1 \in \{6, 7, 8\}$  and  $k_2 = 10$

| sub \ $k_1$ | 6      | 7      | 8      |
|-------------|--------|--------|--------|
| 1           | —      | —      | 0.6635 |
| 2           | —      | —      | —      |
| 3           | —      | —      | —      |
| 4           | 0.8245 | —      | —      |
| 5           | 0.6108 | 0.5679 | 0.3386 |
| 6           | 0.7428 | 0.5922 | 0.3721 |
| 7           | 0.7776 | 0.7090 | —      |
| 8           | 0.4759 | —      | 0.6070 |
| 9           | 0.6512 | 0.4618 | 0.2916 |
| 10          | 0.6248 | —      | —      |
| 11          | 0.5959 | —      | —      |
| 12          | 0.5634 | 0.6094 | 0.6686 |
| 13          | 0.9534 | 0.8441 | 0.8166 |
| 14          | 0.1802 | —      | —      |
| 15          | 0.7409 | 0.7214 | 0.6222 |
| 16          | —      | —      | —      |
| 17          | 0.7682 | 0.7024 | 0.6154 |

The cases marked ‘—’ were not considered due to very few observations for that  $(k_1, k_2)$  pair. In all other cases, there was the existence of a mode in the direction of  $k_2$ .

Table S7: Proportion of decisions between  $k_1$  and  $k_2$  under the fitted model, for  $k_1 \in \{3, 4, 5\}$  and  $k_2 = 10$

| sub \ $k_1$ | 6      | 7      | 8      |
|-------------|--------|--------|--------|
| 1           | 0.7293 | —      | —      |
| 2           | —      | —      | —      |
| 3           | —      | —      | —      |
| 4           | —      | —      | 0.6540 |
| 5           | 0.6978 | 0.7478 | 0.6376 |
| 6           | 0.8773 | 0.6774 | 0.4338 |
| 7           | —      | 0.0973 | 0.6147 |
| 8           | —      | —      | 0.6258 |
| 9           | 0.5831 | 0.7430 | 0.5733 |
| 10          | —      | —      | 0.7455 |
| 11          | —      | —      | 0.5767 |
| 12          | 0.5526 | 0.5739 | —      |
| 13          | 0.7632 | —      | 0.9073 |
| 14          | 0.7670 | 0.5751 | 0.2323 |
| 15          | 0.7586 | 0.6120 | 0.7291 |
| 16          | —      | —      | 0.4662 |
| 17          | 0.4062 | —      | —      |

The cases marked ‘—’ were not considered due to very few observations for that  $(k_1, k_2)$  pair. In all other cases, there was the existence of a mode in the direction of  $k_2$ .

Table S8: Proportion of decisions between  $k_1$  and  $k_2$  under the fitted model, for  $k_1 \in \{6, 7, 8\}$  and  $k_2 = 1$

| sub \ $k_1$ | 6      | 7      | 8      |
|-------------|--------|--------|--------|
| 1           | —      | —      | 0.5862 |
| 2           | —      | —      | —      |
| 3           | —      | —      | —      |
| 4           | 0.4117 | —      | —      |
| 5           | 0.5217 | 0.4926 | 0.3471 |
| 6           | 0.3266 | 0.5007 | 0.5406 |
| 7           | 0.4153 | 0.4884 | —      |
| 8           | 0.4310 | —      | 0.2739 |
| 9           | 0.5610 | 0.6997 | 0.6866 |
| 10          | 0.5157 | —      | —      |
| 11          | 0.3344 | —      | —      |
| 12          | 0.6305 | 0.6511 | 0.7581 |
| 13          | 0.8309 | 0.6973 | 0.5820 |
| 14          | 0.7860 | —      | —      |
| 15          | 0.3965 | 0.4116 | 0.4890 |
| 16          | —      | —      | —      |
| 17          | 0.4541 | 0.4347 | 0.4451 |

The cases marked ‘—’ were not considered due to very few observations for that  $(k_1, k_2)$  pair. In all other cases, there was the existence of a mode in the direction of  $k_2$ .

Table S9: Average proportions of decisions within the region [1,6] when the individual choice was face, given  $k_2 = 1$  vs  $k_2 = 5$

| sub \ $k_2$ | 1             | 5             |
|-------------|---------------|---------------|
| 1           | <b>0.7511</b> | <b>0.6839</b> |
| 2           | <b>0.9983</b> | <b>0.7982</b> |
| 3           | <b>0.9270</b> | <b>0.8535</b> |
| 4           | <b>0.8141</b> | <b>0.6150</b> |
| 5           | 0.7853        | 0.7983        |
| 6           | <b>0.8001</b> | <b>0.7915</b> |
| 7           | 0.7163        | 0.7931        |
| 8           | <b>0.8189</b> | <b>0.7981</b> |
| 9           | <b>0.7934</b> | <b>0.6938</b> |
| 10          | <b>0.7791</b> | <b>0.6644</b> |
| 11          | 0.6761        | 0.6955        |
| 12          | <b>0.8485</b> | <b>0.7794</b> |
| 13          | <b>0.9784</b> | <b>0.8064</b> |
| 14          | 0.9071        | 0.9145        |
| 15          | 0.7771        | 0.8108        |
| 16          | <b>0.6699</b> | <b>0.6773</b> |
| 17          | <b>0.9376</b> | <b>0.9216</b> |

The subjects whose proportion of decisions increased in case of 'FF' cue relative to 'FC/CF' are marked in bold



Table S10: Average proportions of decisions within the region [7,11] when the individual choice was car, given  $k_2 = 10$  vs  $k_2 = 5$

| sub \ $k_2$ | 10            | 5             |
|-------------|---------------|---------------|
| 1           | <b>0.7802</b> | <b>0.6995</b> |
| 2           | <b>0.9909</b> | <b>0.7918</b> |
| 3           | <b>0.9483</b> | <b>0.8235</b> |
| 4           | <b>0.8390</b> | <b>0.6934</b> |
| 5           | <b>0.6971</b> | <b>0.6330</b> |
| 6           | 0.8142        | 0.8359        |
| 7           | <b>0.8587</b> | <b>0.8200</b> |
| 8           | 0.7937        | 0.8131        |
| 9           | <b>0.6047</b> | <b>0.4368</b> |
| 10          | <b>0.7343</b> | <b>0.5576</b> |
| 11          | <b>0.7627</b> | <b>0.7436</b> |
| 12          | <b>0.8135</b> | <b>0.7581</b> |
| 13          | <b>0.9291</b> | <b>0.8744</b> |
| 14          | <b>0.1802</b> | <b>0.1543</b> |
| 15          | <b>0.8683</b> | <b>0.7740</b> |
| 16          | 0.8444        | 0.8461        |
| 17          | <b>0.8828</b> | <b>0.7817</b> |

The subjects whose proportion of decisions increased in case of ‘CC’ cue relative to ‘FC/CF’ are marked in bold

Table S11: Approximate achieved significance level (ASL) for testing the cross-over from individual decision towards contradictory social cue

| $k_1$ \ $k_2$ | 1             | 5 | 10 |
|---------------|---------------|---|----|
| 1             |               |   | 0  |
| 2             |               |   | 0  |
| 3             |               |   | 0  |
| 4             |               |   | 0  |
| 5             |               |   | 0  |
| 6             | 0             |   |    |
| 7             | 0             |   |    |
| 8             | <b>0.1220</b> |   |    |
| 9             | 0             |   |    |
| 10            | 0             |   |    |

Lower the ASL more the evidence against the null hypothesis that the proportion of subjects having a crossover is not more than 0.5. It is clear that in all but one case (marked in bold) the ASL is less than 0.05.

Table S12: Cross-over area under the influence of conflicting cue 'FF'

| sub \ $(k_1, k_2)$ | (1,10) | (2,10) | (3,10) | (4,10) | (5,10) |
|--------------------|--------|--------|--------|--------|--------|
| 1                  | 0.3251 | 0.6484 | 0.6529 | —      | —      |
| 2                  | 0.1526 | 0.2324 | —      | —      | —      |
| 3                  | 0.2711 | 0.4388 | —      | —      | —      |
| 4                  | 0.5984 | —      | —      | —      | 0.6361 |
| 5                  | nco    | 0.1659 | 0.1983 | 0.3208 | 0.4485 |
| 6                  | —      | 0.1442 | 0.2044 | 0.2887 | 0.3838 |
| 7                  | 0.0850 | 0.1460 | —      | 0.0911 | 0.5606 |
| 8                  | 0.0348 | 0.0800 | —      | —      | 0.5501 |
| 9                  | 0.2207 | 0.3162 | 0.2630 | 0.4167 | 0.5075 |
| 10                 | 0.4110 | 0.6277 | —      | —      | 0.7041 |
| 11                 | 0.1604 | —      | —      | —      | 0.5345 |
| 12                 | 0.0277 | 0.1215 | 0.3206 | 0.4937 | —      |
| 13                 | 0.2497 | 0.2171 | 0.6439 | —      | 0.8438 |
| 14                 | nco    | nco    | 0.1953 | nco    | 0.1381 |
| 15                 | 0.0719 | 0.1199 | 0.2166 | 0.4089 | 0.6591 |
| 16                 | 0.1540 | —      | —      | —      | 0.4651 |
| 17                 | 0.0357 | 0.0633 | 0.1971 | —      | —      |

The cases marked '—' were not considered due to very few observations for that  $(k_1, k_2)$  pair. If there is a cross-over we estimate the proportion of decisions in the direction of the social cue 'FF', i.e.  $k_2 = 1$  by the area under the fitted density between 1 and 6. No cross over cases are marked as 'noc'.

Table S13: Cross-over area under the influence of conflicting cue 'CC'

| sub \ $(k_1, k_2)$ | (6,1)  | (7,1)  | (8,1)  | (9,1)  | (10,1) |
|--------------------|--------|--------|--------|--------|--------|
| 1                  | —      | —      | 0.4928 | 0.4982 | 0.3434 |
| 2                  | —      | —      | —      | 0.5388 | 0.3926 |
| 3                  | —      | —      | —      | —      | 0.5247 |
| 4                  | 0.4117 | —      | —      | —      | 0.5073 |
| 5                  | 0.5217 | 0.3410 | 0.1830 | —      | —      |
| 6                  | 0.3266 | 0.2361 | nco    | —      | —      |
| 7                  | 0.4153 | 0.4058 | —      | —      | 0.1602 |
| 8                  | 0.4310 | —      | nco    | 0.2538 | 0.1938 |
| 9                  | 0.5610 | 0.5466 | 0.5863 | —      | —      |
| 10                 | 0.5157 | —      | —      | 0.7328 | 0.5577 |
| 11                 | 0.3344 | —      | —      | —      | 0.1281 |
| 12                 | 0.6305 | 0.5799 | 0.5918 | 0.3035 | 0.0596 |
| 13                 | 0.8309 | 0.6385 | 0.2783 | —      | 0.5520 |
| 14                 | 0.7860 | —      | —      | —      | —      |
| 15                 | 0.3965 | 0.2553 | 0.1781 | 0.3729 | nco    |
| 16                 | —      | —      | —      | —      | 0.2214 |
| 17                 | 0.4541 | nco    | nco    | 0.0825 | nco    |

The cases marked '—' were not considered due to very few observations for that  $(k_1, k_2)$  pair. If there is a cross-over we estimate the proportion of decisions in the direction of the social cue 'CC', i.e.  $k_2 = 10$  by the area under the fitted density between 6 and 11. No cross over cases are marked as 'noc'.

Table S14: Comparison of cross over areas under conflicting and concurring cues

| Conf-Conc          | p-value |
|--------------------|---------|
| (1, 10) – (1, 1)   | 0.0000  |
| (2, 10) – (2, 1)   | 0.0004  |
| (3, 10) – (3, 1)   | 0.0039  |
| (4, 10) – (4, 1)   | 0.2344  |
| (5, 10) – (5, 1)   | 0.0005  |
| (6, 1) – (6, 10)   | 0.0017  |
| (7, 1) – (7, 10)   | 0.0078  |
| (8, 1) – (8, 10)   | 0.0156  |
| (9, 1) – (9, 10)   | 0.0078  |
| (10, 1) – (10, 10) | 0.0005  |

p-values of the right-tailed paired Wilcoxon signed rank test for the null hypothesis that A-B has zero median, where A contains the cross-over areas across the subjects under conflicting cue and B contains the cross-over areas across the subjects under concurring cue for the same value of  $k_1$  at 5% significance level. It is evident that the cross-over is significantly more for conflicting cues.

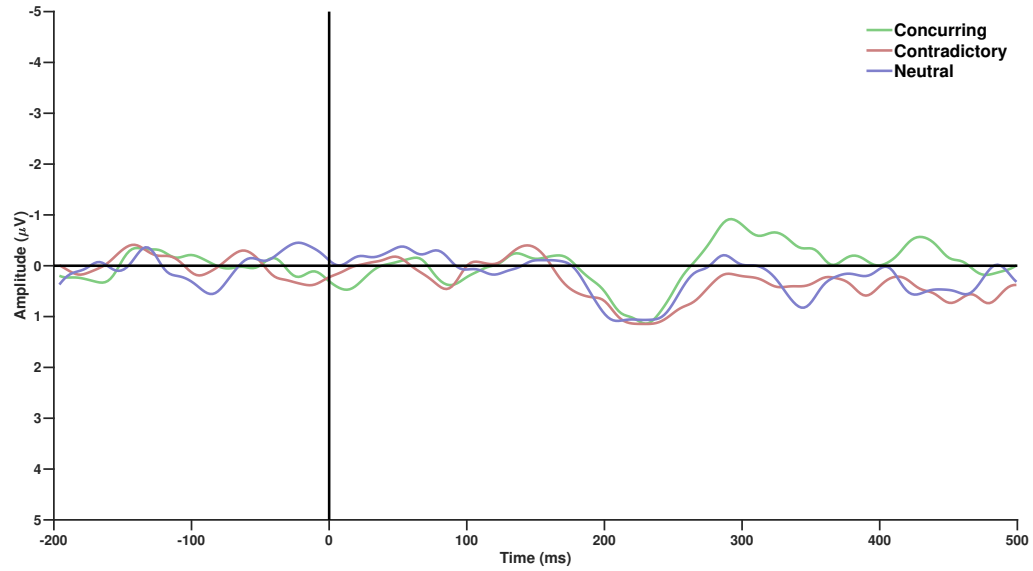

Figure S1: Grand average of difference waveforms over fronto central electrodes.

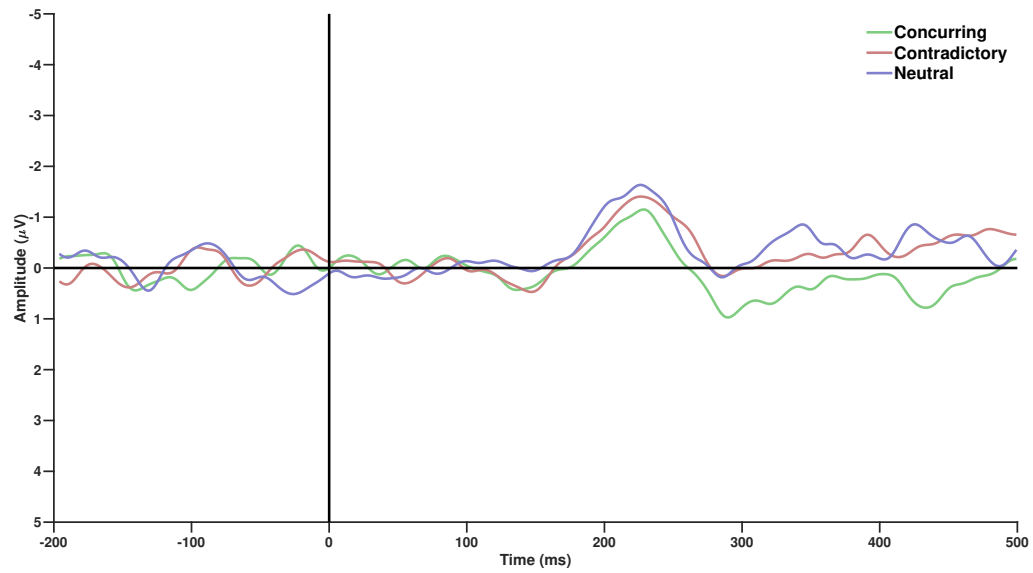

Figure S2: Grand average of difference waveforms over parieto occipital electrodes.
